# Supplementary material for: Pyridinic and graphitic nitrogen-rich graphene for high-performance supercapacitors and metal-free bifunctional electrocatalysts for ORR and OER
Source: Royal Society of Chemistry journal article supplement (doi:10.1039/c7ra01355h), 2017-01-01
Supplement: c7ra01355h1.pdf [file c7ra01355h1.pdf]

Supporting Information for:

## Pyridinic and Graphitic Nitrogen-rich Graphene for High-Performance Supercapacitor and Metal-free Bifunctional Electrocatalyst for ORR and OER

Shaikh Nayeem Faisal,\*<sup>a</sup> Enamul Haque,<sup>a</sup> Nikan Noorbehesht,<sup>a</sup> Weimin Zhang,<sup>a</sup> Andrew T. Harris<sup>a</sup> Tamara L. Church<sup>a</sup> and Andrew I. Minett\*<sup>a</sup>

<sup>a</sup>Laboratory of Sustainable Technology, School of Chemical and Biomolecular Engineering, University of Sydney, NSW 2006, Australia.

Email: [andrew.minett@sydney.edu.au](mailto:andrew.minett@sydney.edu.au) and [shaikh.faisal@sydney.edu.au](mailto:shaikh.faisal@sydney.edu.au)

### Table of Contents

| Item                                                                                                                                                                          | Figure   |
|-------------------------------------------------------------------------------------------------------------------------------------------------------------------------------|----------|
| Thermogravimetric analysis of an as-prepared GO–Uric acid composite and Uric acid at a heating rate of 5 °C min <sup>-1</sup> in an argon environment.                        | S1       |
| SEM images of NG1 and NG5.                                                                                                                                                    | S2       |
| XPS spectra of GO (green) and rGO (black).                                                                                                                                    | S3       |
| High-resolution C1s XPS spectra of NG5.                                                                                                                                       | S4       |
| High-resolution N1s XPS spectra of NG5.                                                                                                                                       | S5       |
| High-resolution N1s XPS spectra of NG1.                                                                                                                                       | S6       |
| Nitrogen adsorption/desorption isotherm of NG10.                                                                                                                              | S7       |
| Nitrogen adsorption/desorption isotherm of NG5.                                                                                                                               | S8       |
| Nitrogen adsorption/desorption isotherm of NG1.                                                                                                                               | S9       |
| Nitrogen adsorption/desorption isotherm of rGO.                                                                                                                               | S10      |
| CVs of NG10 in a 3-electrode cell using Ag/AgCl as a reference electrode at different scan rates of 50, 100 and 200 mV s <sup>-1</sup> .                                      | S11      |
| Optical images of swagelok test cell (T-cell).                                                                                                                                | S12      |
| Ragone plot of the T-cell device based on two-electrode mass of NG10.                                                                                                         | S13      |
| LSV curves at 1600 rpm with the presence of oxygen for different mass loading of NG10 for ORR.                                                                                | S14      |
| EIS curves for different mass loading of NG10.                                                                                                                                | S15      |
| LSV curves for different mass loading of NG10 for OER                                                                                                                         | S16      |
| CVs of NG10 at a scan rate of 50 mV s <sup>-1</sup> in O <sub>2</sub> -saturated 0.1-M KOH solution and O <sub>2</sub> -saturated 0.1-M KOH solution containing 3 M methanol. | S17      |
| Comparison of the gravimetric performance for the as-prepared NG10 with previously reported nitrogen-doped and boron-doped graphene.                                          | Table S1 |

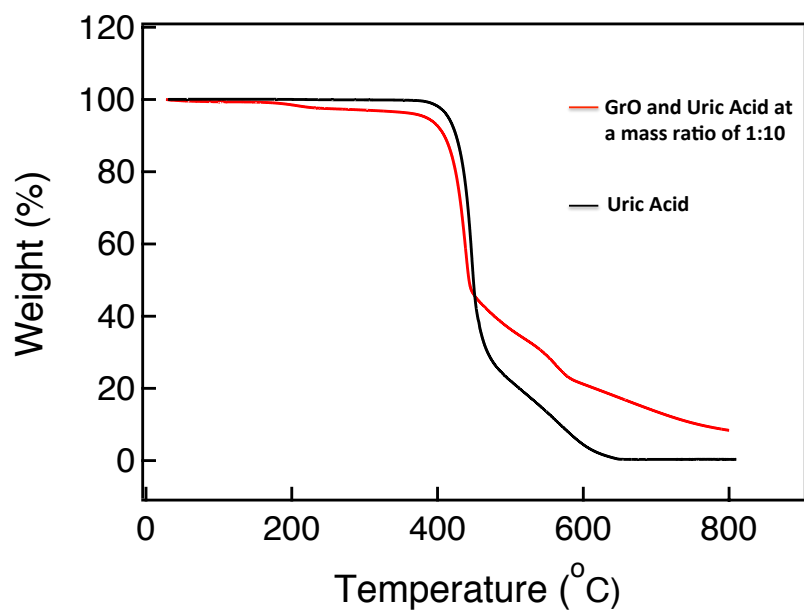

**Figure S1.** Thermogravimetric analysis of an as-prepared GO–uric acid composite at a ratio of 1:10 by mass and uric acid only. The composites were heated at  $5\text{ °C min}^{-1}$  under flowing argon.

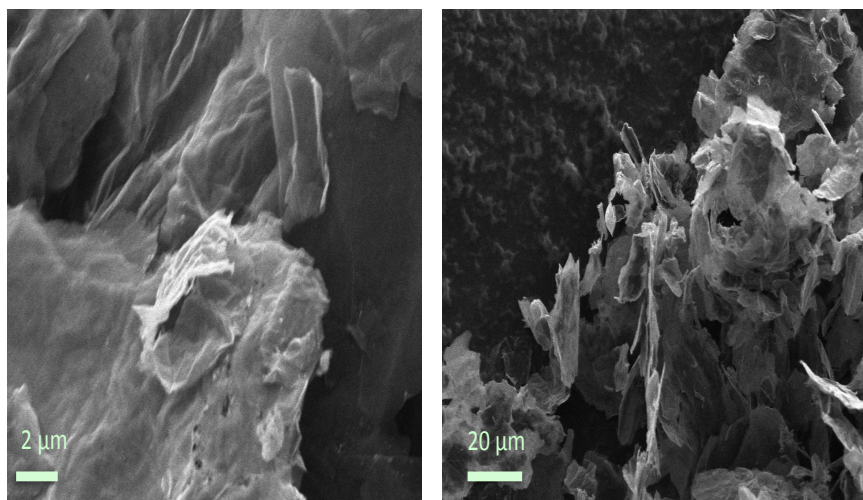

**Figure S2.** SEM images of NG1 and NG5.

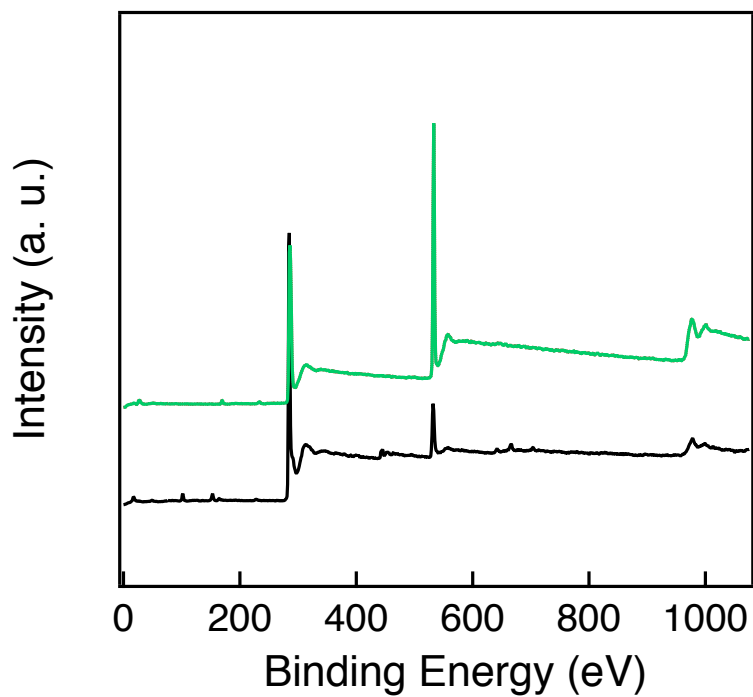

**Figure S3** XPS spectra of GO (green) and rGO (black).

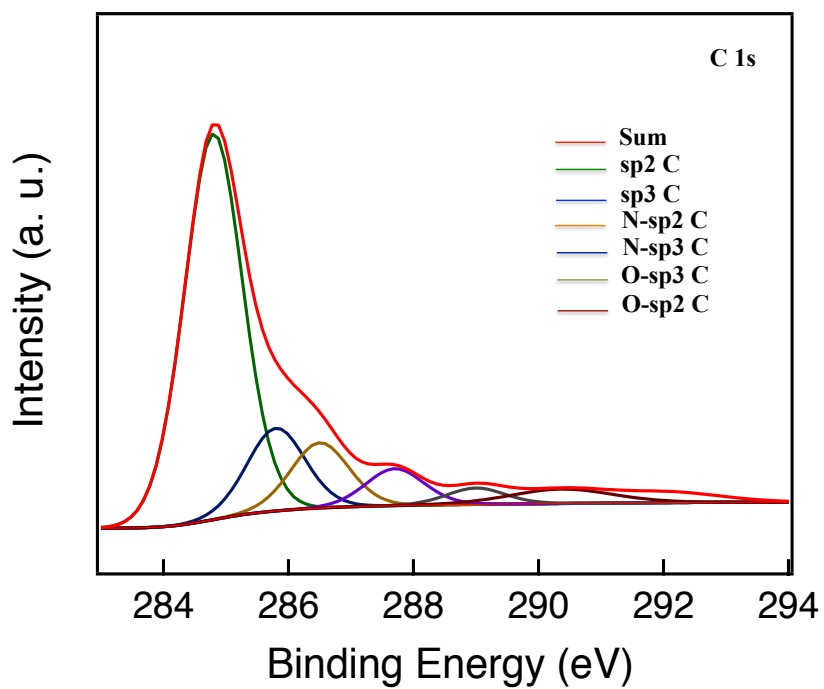

**Figure S4.** High resolution C1s XPS spectra of NG5.

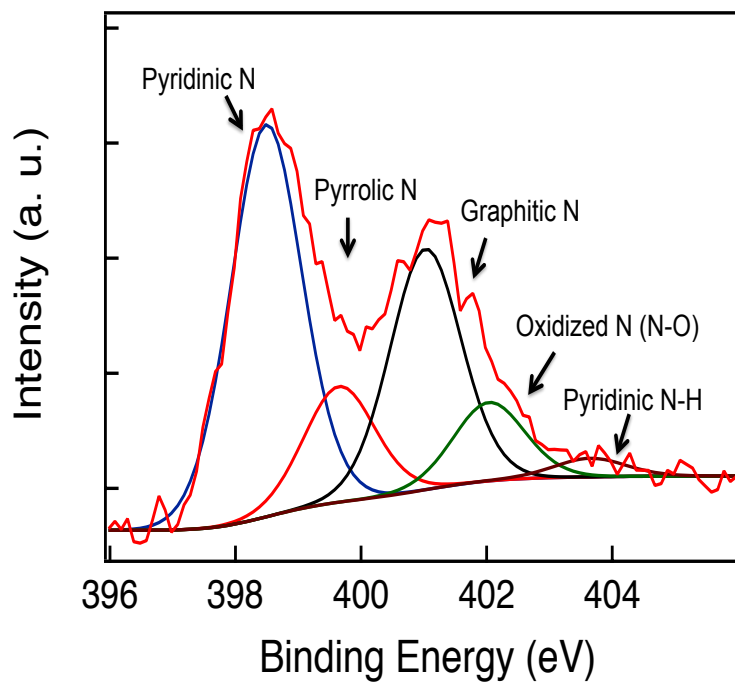

**Figure S5.** High resolution N1s XPS spectra of NG5.

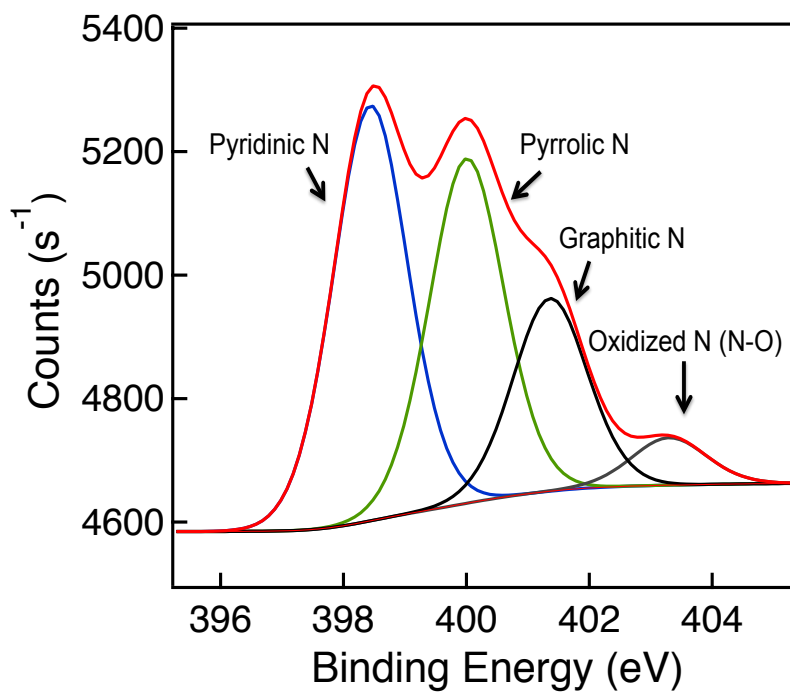

**Figure S6.** High resolution N1s XPS spectra of NG1.

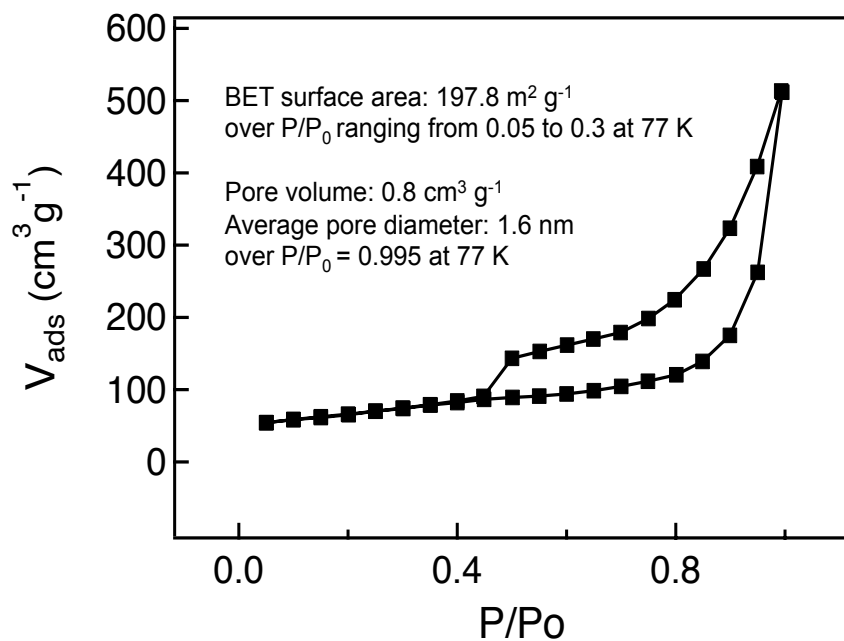

**Figure S7.** Nitrogen adsorption/desorption isotherm of NG10.

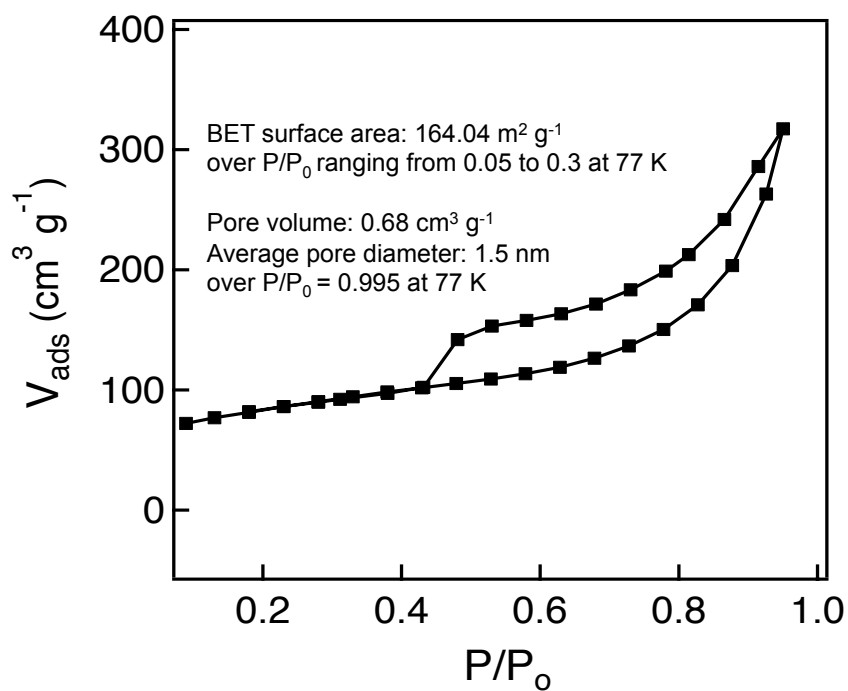

**Figure S8.** Nitrogen adsorption/desorption isotherm of NG5.

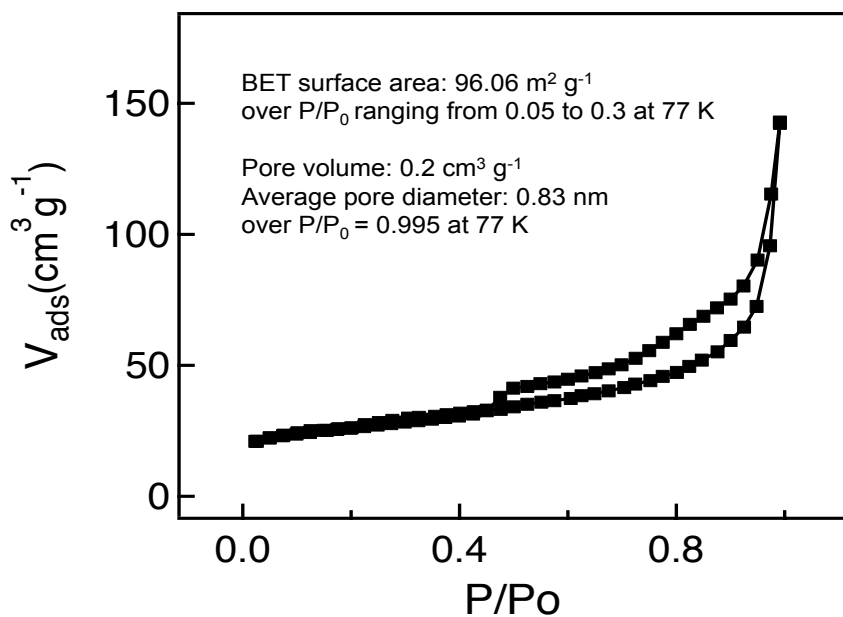

**Figure S9** Nitrogen adsorption/desorption isotherms of NG1.

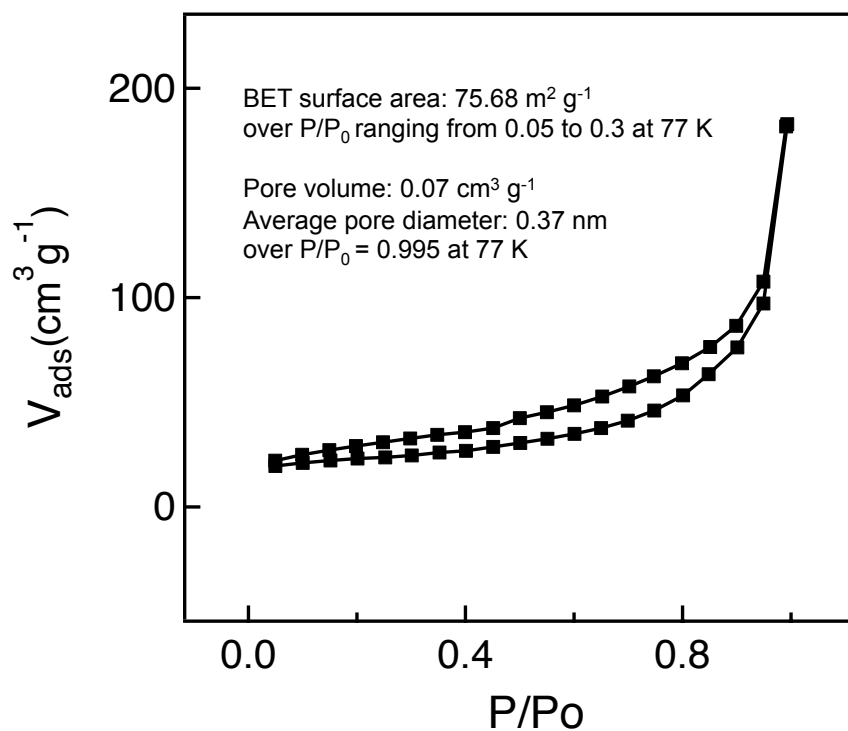

**Figure S10.** Nitrogen adsorption/desorption isotherm of rGO.

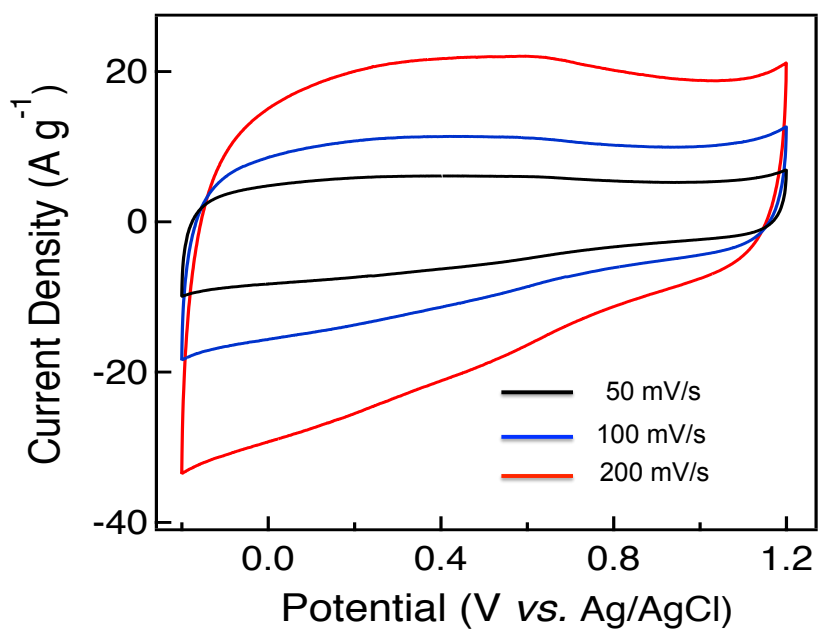

**Figure S11.** Cyclic voltammograms of NG10 in a three-electrode cell using Ag/AgCl as a reference electrode and Pt wire as counter electrode at scan rates of 50, 100 and 200 mV s<sup>-1</sup> in 0.5-M H<sub>2</sub>SO<sub>4</sub> solution.

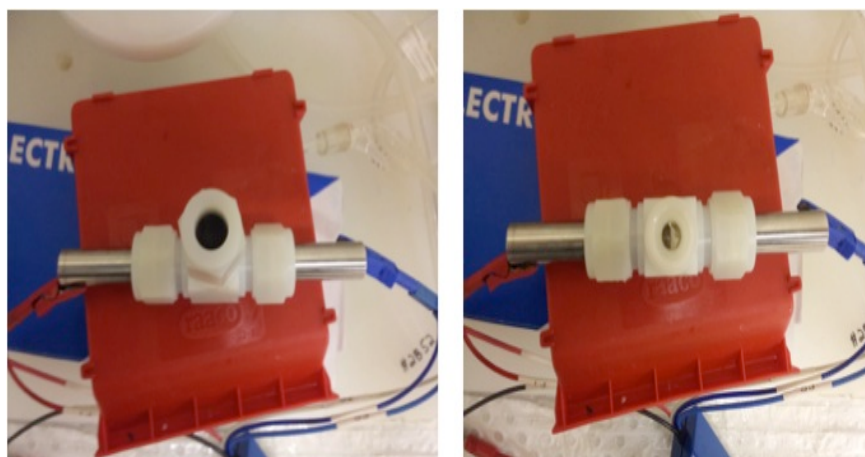

**Figure S12.** Optical images of stacked electrodes supercapacitor (T-cell).

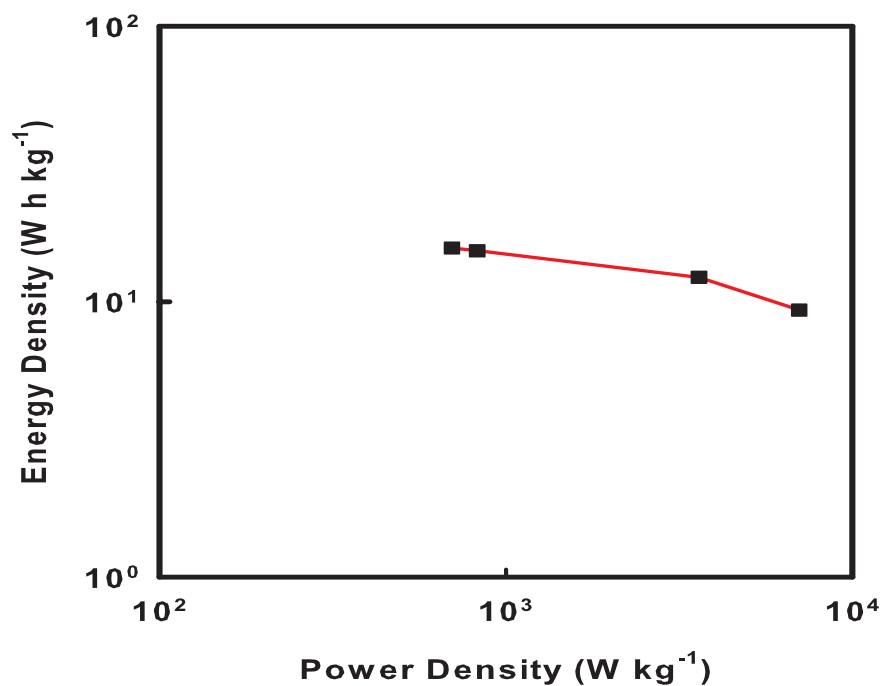

**Figure S13.** Ragone plot of the T-cell device based on two-electrode mass of active materials.

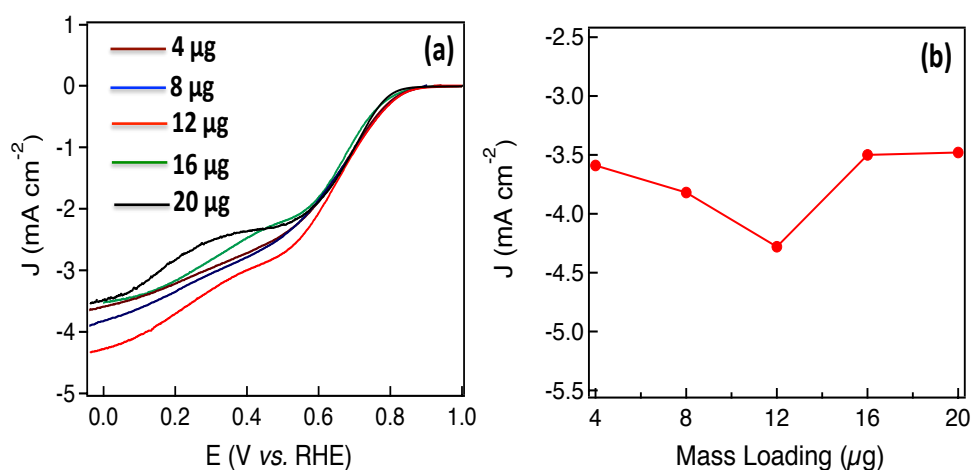

**Figure S14.** (a) LSV curves at 1600 rpm with the presence of oxygen for different mass loading of NG10 for ORR. (b) Comparison of current density with mass loading of active material.



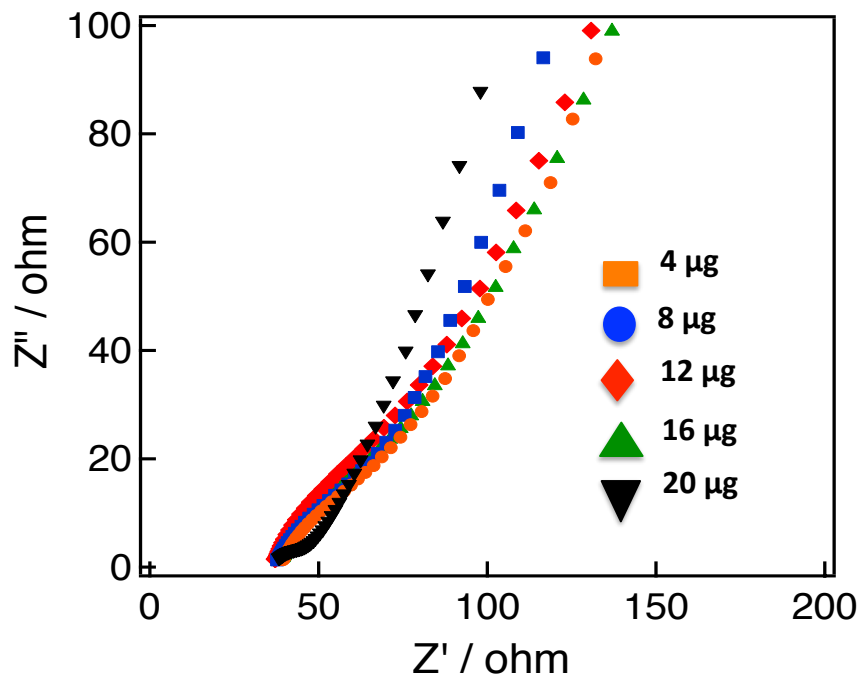

**Figure S15.** EIS curves for different mass loading of NG10.

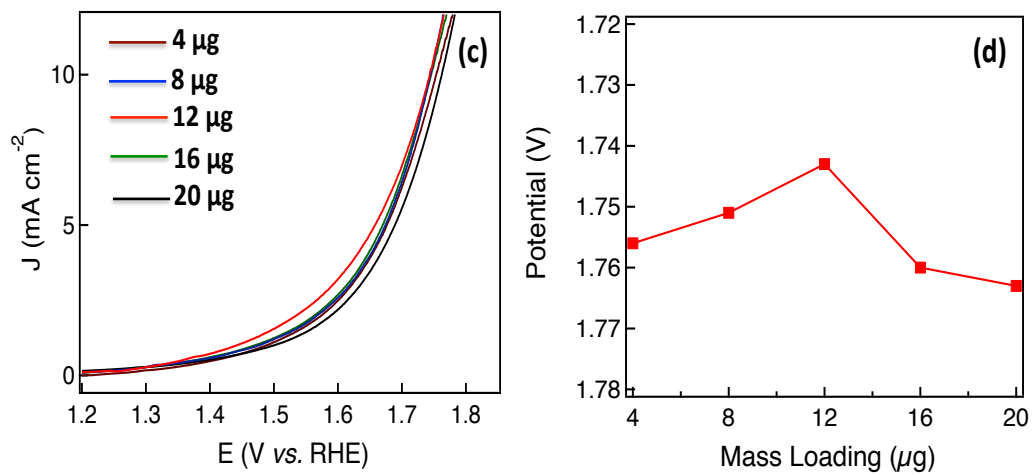

**Figure S16.** (a) LSV curves for different mass loading of NG10 for OER. (b) Comparison of Potentials at a current density of  $10 \text{ mA cm}^{-2}$  with the different mass loadings of active material.

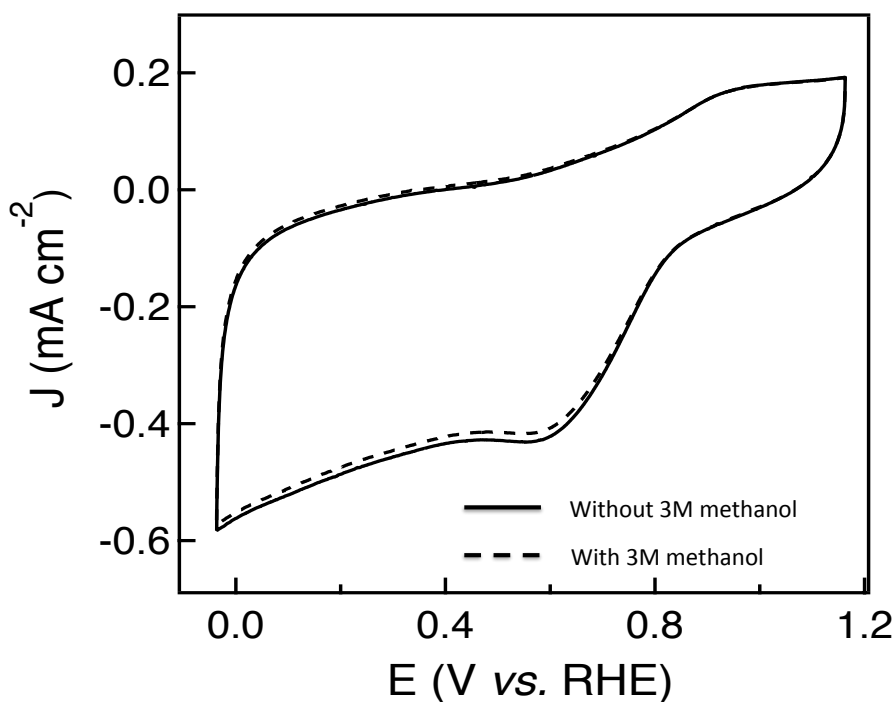

**Figure S17.** Cyclic voltammograms of NG10 at a scan rate of  $50 \text{ mV s}^{-1}$  in  $\text{O}_2$ -saturated 0.1-M KOH solution and  $\text{O}_2$ -saturated 0.1-M KOH solution containing 3 M methanol.

**Table S1.** Comparison of the gravimetric performance for the as-prepared NG10 with previously reported nitrogen-doped and boron-doped nanocarbon materials.

| Material                                             | Doping/<br>Reducing<br>agent                                    | Gravimetric<br>Capacitance, $C_g$ ( $\text{F g}^{-1}$ ) | Electrolyte                                        | Energy<br>density<br>( $\text{Wh kg}^{-1}$ ) | Ref. |
|------------------------------------------------------|-----------------------------------------------------------------|---------------------------------------------------------|----------------------------------------------------|----------------------------------------------|------|
| Crumpled<br>Nitrogen-doped<br>Graphene<br>nanosheets | Cyanamide<br>( $\text{NH}_2\text{CN}$ )                         | $245.9 \text{ F g}^{-1}$<br>at $1 \text{ A g}^{-1}$     | $[\text{Bu}_4\text{N}]\text{BF}_4$<br>acetonitrile | -                                            | 1    |
| 3D Nitrogen-<br>doped Graphene-<br>CNT               | Pyrrole                                                         | $180 \text{ F g}^{-1}$ at<br>$0.5 \text{ A g}^{-1}$     | 6 M KOH                                            | -                                            | 2    |
| Reduced<br>Graphene Oxide                            | Urea                                                            | $255 \text{ F g}^{-1}$ at<br>$0.5 \text{ A g}^{-1}$     | 6 M KOH                                            | -                                            | 3    |
| Nitrogen-doped<br>Graphene                           | Urea                                                            | $326 \text{ F g}^{-1}$ at<br>$0.2 \text{ A g}^{-1}$     | 6 M KOH                                            | 25.02                                        | 4    |
| 3D Nitrogen and<br>Boron co-doped<br>Graphene        | Ammonia<br>boron<br>trifluoride<br>( $\text{NH}_3\text{BF}_3$ ) | $239 \text{ F g}^{-1}$ at<br>$1 \text{ mV s}^{-1}$      | 1 M $\text{H}_2\text{SO}_4$                        | 8.7                                          | 5    |
| Boron-doped<br>graphene<br>nanoplatelets             | Borane-<br>tetrahydrofur<br>an ( $\text{BH}_3\text{-THF}$ )     | $160 \text{ F g}^{-1}$ at<br>$1 \text{ A g}^{-1}$       | 6 M KOH                                            | -                                            | 6    |

|                                        |                         |                                                  |                                          |             |                  |
|----------------------------------------|-------------------------|--------------------------------------------------|------------------------------------------|-------------|------------------|
| Nitrogen-doped Graphene                | phenylenedia mine       | 301 F g <sup>-1</sup> at 0.1 A g <sup>-1</sup>   | 6 M KOH                                  | -           | 7                |
| Nitrogen-enriched nonporous carbon     | Ammonia                 | 198 F g <sup>-1</sup> at 0.05 A g <sup>-1</sup>  | 6 M KOH                                  | -           | 8                |
| Nitrogen-enriched carbon nanotube      | Melamine                | 167 F g <sup>-1</sup> at 1 V s <sup>-1</sup>     | 1 M H <sub>2</sub> SO <sub>4</sub>       | -           | 9                |
| Nitrogen-doped porous carbon nanofiber | Polypyrrole             | 202 F g <sup>-1</sup> at 1 A g <sup>-1</sup>     | 6 M KOH                                  | 7.1         | 10               |
| Nitrogen-doped porous carbon           | Pyrrrole                | 240 F g <sup>-1</sup> at 0.1 A g <sup>-1</sup>   | 1 M H <sub>2</sub> SO <sub>4</sub>       | 19.5        | 11               |
| Nitrogen-doped carbon foam             | Melamine                | 203 F g <sup>-1</sup> at 0.5 A g <sup>-1</sup>   | 6 M KOH                                  | 47.8        | 12               |
| Graphitic Carbon nitride               | Melamine                | 264 at F g <sup>-1</sup> 0.4 A g <sup>-1</sup>   | 0.1 M LiClO <sub>4</sub>                 | 30          | 13               |
| Nitrogen-doped Graphene                | Hexamethyle netetramine | 270 F g <sup>-1</sup> at 1 A g <sup>-1</sup>     | 1 M H <sub>2</sub> SO <sub>4</sub>       | -           | 14               |
| Nitrogen-doped Graphene                | Aminoterphth alic acid  | 210 F g <sup>-1</sup> at 1 A g <sup>-1</sup>     | 0.5 M H <sub>2</sub> SO <sub>4</sub>     | -           | 15               |
| <b>Nitrogen-doped Graphene</b>         | <b>Uric Acid</b>        | <b>230 Fg<sup>-1</sup> at 1 A g<sup>-1</sup></b> | <b>0.5 M H<sub>2</sub>SO<sub>4</sub></b> | <b>62.6</b> | <b>This work</b> |

#### References:

- [1] Z. Wen, X. Wang, S. Mao, Z. Bo, H. Kim, S. Cui, G. Lu, X. Feng and J. Chen, *Adv. Mater.*, 2012, **24**, 5610-5616.
- [2] B. You, L. Wang, L. Yao and J. Yang, *Chem. Commun.* 2013, **49**, 5016-50.
- [3] Z. Lei, L. Lu and X. S. Zhao, *Energy Environ. Sci.* 2012, **5**, 6391-.
- [4] L. Sun, L. Wang, C. Tian, T. Tan, Y. Xie, K. Shi, M. Li and H. Fu, *RSC Adv.* 2012, **2**, 4498.
- [5] Z. -S. Wu, A. Winter, L. Chen, Y. Sun, A. Turchanin, X. Feng and K. Müllen, *Adv. Mater.* 2012, **24**, 5130-5135.
- [6] J. Han, L. L. Zhang, S. Lee, J. Oh, K. -S. Lee, J. R. Potts, J. Ji, X. Zhao, R. S. Ruoff and S. Park, *ACS Nano* 2013, **7**, 19-26.

- [7] Y. Lu, F. Zhang, T. Zhang, K. Leng, L. Zhang, X. Yang, Y. Ma, Y. Huang, M. Zhang and Y. Chen, *Carbon* 2013, **63**, 508-514.
- [8] D. Hulicova-Jurcakova, M. Kodama, S. Shiraishi, H. Hatori, Z. H. Zhu and G. Q. Lu, *Adv. Funct. Mater.* 2009, **19**, 1800-1809.
- [9] G. Lota, K. Lota and E. Frackowiak, *Electrochem. Commun.* 2007, **9**, 1828-1832.
- [10] J. -F. Chen, X. -D. Zhang, H. -W. Liang, M. Kong, Q. -F. Guan, P. Chen, Z. -Y. Wu and S. -H. Yu, *ACS Nano* 2012, **6**, 7092-7102.
- [11] G. A. Ferrero, A. B. Fuertes and M. Seyilla, *J. Mater. Chem. A* 2015, **3**, 2914-2923.
- [12] J. Wang, L. Shen, P. Nie, X. Yun, Y. Xu, H. Dou and X. Zhang, *J Mater. Chem. A* 2015, **3**, 2853-2860.
- [13] Q. Chen, Y. Zhao, X. Huang, N. Chen and L. Qu, *J. Mater Chem A* 2015, **3**, 6761-6766.
- [14] Y. Zou, I. A. Kinloch and R. A. W. Dryfe, *J. Mater. Chem. A* 2014, **2**, 19495-19499.
- [15] E. Haque, M. M. Islam, E. Pourazadi, M. Hasan, S. N. Faisal, A. K. Roy, K. Konstantinov, A. T. Harris, A. I. Minett and V. G. Gomes, *RSC Adv.*, 2015, **5**, 30679-30686.
